# Supplementary material for: An optoelectronic duple bistable phosphate with ultrahigh thermal stability
Source: Royal Society of Chemistry journal article supplement (doi:10.1039/c7tc04644h), 2017-11-23
Supplement: c7tc04644h1.pdf [file c7tc04644h1.pdf]

## Supporting Information

# An Optoelectronic Duple Bistable Phosphate with Ultrahigh Thermal Stability

Yaoguo Shen,<sup>abc</sup> Sangen Zhao,<sup>\*a</sup> Chenxi Wang,<sup>a</sup> Zujian Wang,<sup>a</sup> Jianghe Feng,<sup>a</sup> Maochun Hong<sup>a</sup> and Junhua Luo<sup>\*a</sup>

### Contents

|                                                                                                       |    |
|-------------------------------------------------------------------------------------------------------|----|
| Fig. S1. Experimental XRD patterns for <b>1</b> . .....                                               | S2 |
| Table S1. Crystal data and structure refinement for <b>1</b> in LTP and HTP. ....                     | S3 |
| Table S2. Atom coordinates and equivalent isotropic displacement parameters for <b>1</b> in LTP. .... | S4 |
| Table S3. Atom coordinates and equivalent isotropic displacement parameters for <b>1</b> in HTP. .... | S4 |
| Table S4. Selected bond distances and angles for <b>1</b> in LTP. ....                                | S5 |
| Table S5. Selected bond distances and angles for <b>1</b> in HTP. ....                                | S6 |
| Table S6. Anisotropic displacement parameters for <b>1</b> in LTP. ....                               | S7 |
| Table S7. Anisotropic displacement parameters for <b>1</b> in HTP. ....                               | S7 |

---

<sup>a</sup> State Key Laboratory of Structural Chemistry, Fujian Institute of Research on the Structure of Matter, Chinese Academy of Sciences, Fuzhou 350002, China. Email: [jhluo@fjirsm.ac.cn](mailto:jhluo@fjirsm.ac.cn), [zhaosangen@fjirsm.ac.cn](mailto:zhaosangen@fjirsm.ac.cn)

<sup>b</sup> University of Chinese Academy of Sciences, Beijing 100049, China

<sup>c</sup> Department of Physics and Electronic Information Engineering, Minjiang University, Fuzhou, Fujian 350108, China

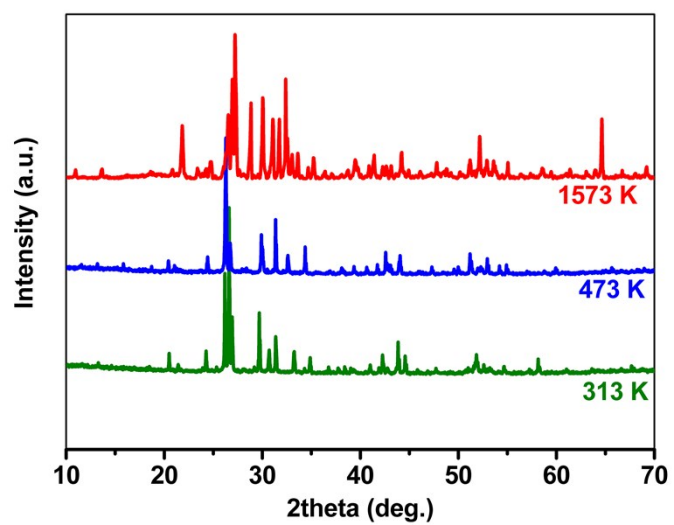

**Fig. S1.** Experimental XRD patterns for **1**. The two curves at the bottom were measured at 313 K and 473 K, respectively. The top curve was measured at room temperature on the sintered **1** sample during 1573 K.

**Table S1. Crystal data and structure refinement for 1 in LTP and HTP.**

| formula                                                                                                                  | CsCdPO <sub>4</sub> (LTP)                                          | CsCdPO <sub>4</sub> (HTP)                                          |
|--------------------------------------------------------------------------------------------------------------------------|--------------------------------------------------------------------|--------------------------------------------------------------------|
| formula weight (g/mol)                                                                                                   |                                                                    | 340.28                                                             |
| crystal system                                                                                                           | monoclinic                                                         | orthorhombic                                                       |
| space group                                                                                                              | <i>P</i> 2 <sub>1</sub> (4)                                        | <i>Pnma</i> (62)                                                   |
| <i>a</i> (Å)                                                                                                             | 9.0589(4)                                                          | 9.3971(8)                                                          |
| <i>b</i> (Å)                                                                                                             | 5.6406(2)                                                          | 5.6764(6)                                                          |
| <i>c</i> (Å)                                                                                                             | 9.4634(4)                                                          | 9.3171(11)                                                         |
| <i>B</i>                                                                                                                 | 90.244(4)                                                          | 90                                                                 |
| <i>V</i> (Å <sup>3</sup> )                                                                                               | 483.55(4)                                                          | 496.99(9)                                                          |
| <i>Z</i>                                                                                                                 | 4                                                                  | 4                                                                  |
| crystal size (mm <sup>3</sup> )                                                                                          | 0.25 × 0.13 × 0.08                                                 | 0.12 × 0.1 × 0.07                                                  |
| $\rho_{\text{calcd}}$ (g/cm <sup>3</sup> )                                                                               | 4.67386                                                            | 4.548                                                              |
| temperature (K)                                                                                                          | 100(2)                                                             | 460(2)                                                             |
| $\mu$ (mm <sup>-1</sup> )                                                                                                | 12.160                                                             | 11.831                                                             |
| <i>F</i> (000)                                                                                                           | 600                                                                | 600                                                                |
| data/restraints/parameters                                                                                               | 1968/1/128                                                         | 556/30/65                                                          |
| <i>R</i> (int)                                                                                                           | 0.0411                                                             | 0.0180                                                             |
| GOF ( <i>F</i> <sup>2</sup> )                                                                                            | 1.022                                                              | 1.113                                                              |
| Flack parameter                                                                                                          | 0.35(4)                                                            |                                                                    |
| final <i>R</i> indices<br>[ <i>F</i> <sub>0</sub> <sup>2</sup> > 2σ( <i>F</i> <sub>c</sub> <sup>2</sup> )] <sup>a)</sup> | <i>R</i> <sub>1</sub> = 0.0306,<br><i>wR</i> <sub>2</sub> = 0.0738 | <i>R</i> <sub>1</sub> = 0.0388,<br><i>wR</i> <sub>2</sub> = 0.1106 |
| final <i>R</i> indices (all data) <sup>a)</sup>                                                                          | <i>R</i> <sub>1</sub> = 0.0325,<br><i>wR</i> <sub>2</sub> = 0.0724 | <i>R</i> <sub>1</sub> = 0.0444,<br><i>wR</i> <sub>2</sub> = 0.1048 |

<sup>a)</sup>  $R_1 = \Sigma||F_0| - |F_c|| / \Sigma|F_0|$  and  $wR_2 = [\Sigma[w(F_0^2 - F_c^2)^2] / \Sigma[w(F_0^2)^2]]^{1/2}$  for  $F_0^2 > 2\sigma(F_c^2)$

**Table S2. Atom coordinates and equivalent isotropic displacement parameters for 1 in LTP.**

| Atom | Wyck. | Site | $x/a$      | $y/b$       | $z/c$      | $U_{eq} (\text{\AA}^2)^a$ | BVS  |
|------|-------|------|------------|-------------|------------|---------------------------|------|
| Cs1  | 2a    | 1    | 0.17753(6) | 0.88599(9)  | 0.01413(6) | 0.0234(2)                 | 1.31 |
| Cs2  | 2a    | 1    | 0.32266(6) | 0.92720(11) | 0.51357(6) | 0.0259(2)                 | 0.91 |
| Cd1  | 2a    | 1    | 0.59641(7) | 0.87802(13) | 0.16327(7) | 0.0235(2)                 | 2.03 |
| Cd2  | 2a    | 1    | 0.07374(7) | 0.43844(12) | 0.34128(7) | 0.0231(2)                 | 1.91 |
| P1   | 2a    | 1    | 0.6014(3)  | 0.8789(5)   | -0.1889(3) | 0.0222(5)                 | 4.84 |
| P2   | 2a    | 1    | -0.0824(2) | 0.9023(5)   | 0.3071(2)  | 0.0227(5)                 | 4.93 |
| O1   | 2a    | 1    | 0.6844(6)  | 0.9028(14)  | -0.0460(7) | 0.0273(14)                |      |
| O2   | 2a    | 1    | 0.6948(7)  | 0.9909(13)  | -0.3068(7) | 0.0318(17)                |      |
| O3   | 2a    | 1    | 0.4491(7)  | 1.0058(11)  | -0.1841(8) | 0.0302(16)                |      |
| O4   | 2a    | 1    | 0.4213(7)  | 1.1147(12)  | 0.2248(7)  | 0.0258(15)                |      |
| O5   | 2a    | 1    | -0.0060(7) | 0.8322(13)  | 0.4475(7)  | 0.0296(16)                |      |
| O6   | 2a    | 1    | -0.0089(8) | 1.1196(11)  | 0.2402(8)  | 0.0294(16)                |      |
| O7   | 2a    | 1    | -0.0606(8) | 0.6853(11)  | 0.2102(7)  | 0.0250(15)                |      |
| O8   | 2a    | 1    | -0.2476(7) | 0.9476(14)  | 0.3328(7)  | 0.0305(16)                |      |

<sup>a</sup> $U_{eq}$  is defined as one-third of the trace of the orthogonalized  $U_{ij}$  tensor.

**Table S3. Atom coordinates and equivalent isotropic displacement parameters for 1 in HTP.**

| Atom | Wyck. | Site | $x/a$       | $y/b$    | $z/c$       | $U_{eq} (\text{\AA}^2)^a$ |
|------|-------|------|-------------|----------|-------------|---------------------------|
| Cs1  | 4c    | .m.  | 0.01272(10) | 1/4      | 0.18222(10) | 0.0657(4)                 |
| Cd1  | 4c    | .m.  | 0.16093(9)  | 1/4      | 0.58469(11) | 0.0567(4)                 |
| P1   | 4c    | .m.  | 0.3044(3)   | 1/4      | -0.0920(3)  | 0.0458(7)                 |
| O1   | 8d    | 1    | 0.2313(16)  | 0.482(2) | -0.0469(16) | 0.068(4)                  |
| O2   | 8d    | 1    | 0.194(3)    | 0.153(6) | -0.195(3)   | 0.105(6)                  |
| O3   | 8d    | 1    | 0.283(3)    | 0.414(4) | 0.028(3)    | 0.077(5)                  |
| O4   | 4c    | .m.  | 0.449(2)    | 1/4      | -0.183(2)   | 0.107(5)                  |
| O5   | 4c    | .m.  | 0.314(2)    | 1/4      | -0.244(3)   | 0.105(5)                  |
| O6   | 4c    | .m.  | 0.447(2)    | 1/4      | -0.010(3)   | 0.114(5)                  |

<sup>a</sup> $U_{eq}$  is defined as one-third of the trace of the orthogonalized  $U_{ij}$  tensor.

**Table S4. Selected bond distances and angles for 1 in LTP.**

| Bonds                 | Bond distances<br>(Å) | Bonds                                  | Bond distances<br>/angles (Å)/(°) | Bonds                    | Bond angles (°) |
|-----------------------|-----------------------|----------------------------------------|-----------------------------------|--------------------------|-----------------|
| Cs1—O1 <sup>ii</sup>  | 3.013(7)              | Cd2—O2 <sup>ii</sup>                   | 2.144(7)                          | O2 <sup>ii</sup> —Cd2—O7 | 111.2(3)        |
| Cs1—O1 <sup>iii</sup> | 3.186(7)              | Cd2—O5 <sup>vi</sup>                   | 2.177(7)                          | O6 <sup>ix</sup> —Cd2—O7 | 95.0(3)         |
| Cs1—O3                | 3.173(7)              | Cd2—O6 <sup>ix</sup>                   | 2.169(7)                          | O5 <sup>vi</sup> —Cd2—O7 | 121.9(3)        |
| Cs1—O4                | 3.237(7)              | Cd2—O7                                 | 2.224(7)                          | O2 <sup>ii</sup> —Cd2—O5 | 102.7(2)        |
| Cs1—O6                | 3.032(7)              | P1—O1                                  | 1.539(7)                          | O6 <sup>ix</sup> —Cd2—O5 | 143.2(3)        |
| Cs1—O6 <sup>iv</sup>  | 3.218(8)              | P1—O2                                  | 1.550(6)                          | O5 <sup>vi</sup> —Cd2—O5 | 78.22(14)       |
| Cs1—O7                | 3.067(7)              | P1—O3                                  | 1.555(7)                          | O7—Cd2—O5                | 61.2(2)         |
| Cs1—O7 <sup>i</sup>   | 2.909(7)              | P1—O4 <sup>ii</sup>                    | 1.542(7)                          | O2—P1—O4 <sup>ii</sup>   | 108.0(4)        |
| Cs2—O2 <sup>ii</sup>  | 3.147(7)              | P2—O5                                  | 1.547(7)                          | O2—P1—O1                 | 109.3(4)        |
| Cs2—O2 <sup>iii</sup> | 3.736(8)              | P2—O6                                  | 1.533(8)                          | O4 <sup>ii</sup> —P1—O1  | 109.9(4)        |
| Cs2—O3 <sup>v</sup>   | 3.109(7)              | P2—O7                                  | 1.542(7)                          | O2—P1—O3                 | 108.8(4)        |
| Cs2—O4                | 3.067(7)              | P2—O8                                  | 1.538(7)                          | O4 <sup>ii</sup> —P1—O3  | 109.5(4)        |
| Cs2—O5                | 3.087(7)              | O1—Cd1—O3 <sup>ii</sup>                | 102.7(3)                          | O1—P1—O3                 | 111.2(4)        |
| Cs2—O5 <sup>vii</sup> | 3.687(7)              | O1—Cd1—O4                              | 119.1(3)                          | O6—P2—O8                 | 110.9(4)        |
| Cs2—O8 <sup>vi</sup>  | 3.147(7)              | O3 <sup>ii</sup> —Cd1—O4               | 116.0(3)                          | O6—P2—O7                 | 109.4(4)        |
| Cs2—O8 <sup>vii</sup> | 3.347(7)              | O1—Cd1—O8 <sup>xi</sup>                | 115.4(2)                          | O8—P2—O7                 | 110.7(4)        |
| Cd1—O1                | 2.143(6)              | O3 <sup>ii</sup> —Cd1—O8 <sup>xi</sup> | 103.5(3)                          | O6—P2—O5                 | 111.4(4)        |
| Cd1—O3 <sup>ii</sup>  | 2.149(6)              | O4—Cd1—O8 <sup>xi</sup>                | 99.6(3)                           | O8—P2—O5                 | 109.8(4)        |
| Cd1—O4                | 2.156(7)              | O2 <sup>ii</sup> —Cd2—O5 <sup>vi</sup> | 117.2(3)                          | O7—P2—O5                 | 104.5(4)        |
| Cd1—O8 <sup>xi</sup>  | 2.169(7)              | O6 <sup>ix</sup> —Cd2—O5 <sup>vi</sup> | 94.5(3)                           |                          |                 |

Symmetry codes: (i)  $-x, 0.5+y, -z$ ; (ii)  $1-x, -0.5+y, -z$ ; (iii)  $1-x, 0.5+y, -z$ ; (iv)  $-x, -0.5+y, -z$ ; (v)  $x, y, 1+z$ ; (vi)  $-x, -0.5+y, 1-z$ ; (vii)  $-x, 0.5+y, 1-z$ ; (viii)  $x, y, -1+z$ ; (ix)  $x, -1+y, z$ ; (xi)  $1+x, y, z$ .

**Table S5. Selected bond distances and angles for 1 in HTP.**

| Bonds                  | Bond distances (Å) | Bonds                                   | Bond distance /angles (Å)/(°) | Bonds                                    | Bond angles (°) |
|------------------------|--------------------|-----------------------------------------|-------------------------------|------------------------------------------|-----------------|
| Cs1—O1                 | 3.243(16)          | O2—Cd1 <sup>xvi</sup>                   | 2.15(3)                       | O2 <sup>xi</sup> —Cd1—O4 <sup>vi</sup>   | 74.5(9)         |
| Cs1—O1 <sup>v</sup>    | 3.243(16)          | O3—Cd1 <sup>xiv</sup>                   | 2.05(2)                       | O2 <sup>x</sup> —Cd1—O4 <sup>vi</sup>    | 74.5(9)         |
| Cs1—O1 <sup>iii</sup>  | 3.026(14)          | O4—Cd1 <sup>xvii</sup>                  | 2.19(2)                       | O3 <sup>vii</sup> —Cd1—O1 <sup>ix</sup>  | 112.4(10)       |
| Cs1—O1 <sup>iv</sup>   | 3.026(14)          | O5—Cd1 <sup>xvi</sup>                   | 2.15(2)                       | O3 <sup>vii</sup> —Cd1—O1 <sup>vii</sup> | 25.1(7)         |
| Cs1—O2 <sup>i</sup>    | 3.01(3)            | O6—Cd1 <sup>xvii</sup>                  | 2.12(2)                       | O3 <sup>ix</sup> —Cd1—O1 <sup>vii</sup>  | 112.4(10)       |
| Cs1—O2 <sup>ii</sup>   | 3.01(3)            | O1—P1—O6                                | 104.6(7)                      | O3 <sup>ix</sup> —Cd1—O1 <sup>ix</sup>   | 25.1(7)         |
| Cs1—O3                 | 3.06(3)            | O1 <sup>v</sup> —P1—O1                  | 117.2(12)                     | O3 <sup>vii</sup> —Cd1—O2 <sup>x</sup>   | 116.4(12)       |
| Cs1—O3 <sup>v</sup>    | 3.06(3)            | O1 <sup>v</sup> —P1—O4                  | 121.4(6)                      | O3 <sup>vii</sup> —Cd1—O2 <sup>xi</sup>  | 88.2(12)        |
| Cs1—O4 <sup>vii</sup>  | 3.123(9)           | O1 <sup>v</sup> —P1—O6                  | 104.6(7)                      | O3 <sup>ix</sup> —Cd1—O2 <sup>x</sup>    | 88.2(12)        |
| Cs1—O4 <sup>viii</sup> | 3.123(9)           | O2—P1—O1                                | 100.3(14)                     | O3 <sup>ix</sup> —Cd1—O2 <sup>xi</sup>   | 116.4(12)       |
| Cs1—O5 <sup>vii</sup>  | 3.345(11)          | O2—P1—O1 <sup>v</sup>                   | 63.8(13)                      | O3 <sup>vii</sup> —Cd1—O3 <sup>ix</sup>  | 137.2(17)       |
| Cs1—O6 <sup>vi</sup>   | 3.11(2)            | O2—P1—O4                                | 104.0(12)                     | O3 <sup>vii</sup> —Cd1—O4 <sup>vi</sup>  | 110.0(9)        |
| O1—Cs1 <sup>iii</sup>  | 3.026(14)          | O2—P1—O6                                | 155.1(13)                     | O3 <sup>ix</sup> —Cd1—O4 <sup>vi</sup>   | 110.0(9)        |
| O1—Cs1 <sup>xiv</sup>  | 3.803(16)          | O2 <sup>v</sup> —P1—O1                  | 63.8(13)                      | O3 <sup>vii</sup> —Cd1—O5 <sup>x</sup>   | 91.0(8)         |
| O2—Cs1 <sup>ii</sup>   | 3.01(3)            | O2 <sup>v</sup> —P1—O4                  | 104.0(12)                     | O3 <sup>ix</sup> —Cd1—O5 <sup>x</sup>    | 91.0(8)         |
| O2—Cs1 <sup>xv</sup>   | 3.76(3)            | O2 <sup>v</sup> —P1—O6                  | 155.1(13)                     | O3 <sup>vii</sup> —Cd1—O6 <sup>vi</sup>  | 99.2(9)         |
| O3—Cs1 <sup>xvii</sup> | 3.58(3)            | O3—P1—O1                                | 36.0(11)                      | O3 <sup>ix</sup> —Cd1—O6 <sup>vi</sup>   | 99.2(9)         |
| O4—Cs1 <sup>xiv</sup>  | 3.123(9)           | O3—P1—O4                                | 121.6(13)                     | O4 <sup>vi</sup> —Cd1—O1 <sup>vii</sup>  | 130.7(4)        |
| O4—Cs1 <sup>xv</sup>   | 3.123(9)           | O3—P1—O6                                | 75.2(14)                      | O4 <sup>vi</sup> —Cd1—O1 <sup>ix</sup>   | 130.7(4)        |
| O5—Cs1 <sup>xiv</sup>  | 3.345(11)          | O3 <sup>v</sup> —P1—O1                  | 105.6(13)                     | O5 <sup>x</sup> —Cd1—O1 <sup>vii</sup>   | 96.1(6)         |
| O5—Cs1 <sup>xv</sup>   | 3.345(11)          | O3 <sup>v</sup> —P1—O4                  | 121.6(13)                     | O5 <sup>x</sup> —Cd1—O1 <sup>ix</sup>    | 96.1(6)         |
| O6—Cs1 <sup>xvii</sup> | 3.11(2)            | O3 <sup>v</sup> —P1—O6                  | 75.2(14)                      | O5 <sup>x</sup> —Cd1—O2 <sup>x</sup>     | 36.1(9)         |
| P1—O1                  | 1.545(12)          | O5—P1—O1                                | 107.4(7)                      | O5 <sup>x</sup> —Cd1—O2 <sup>xi</sup>    | 36.1(9)         |
| P1—O1 <sup>v</sup>     | 1.545(12)          | O5—P1—O4                                | 54.4(11)                      | O5 <sup>x</sup> —Cd1—O4 <sup>vi</sup>    | 107.2(8)        |
| P1—O2                  | 1.51(3)            | O5—P1—O6                                | 116.1(13)                     | O6 <sup>vi</sup> —Cd1—O1 <sup>vii</sup>  | 104.6(6)        |
| P1—O2 <sup>v</sup>     | 1.51(3)            | O6—P1—O4                                | 61.7(12)                      | O6 <sup>vi</sup> —Cd1—O1 <sup>ix</sup>   | 104.6(6)        |
| P1—O3                  | 1.47(2)            | O1 <sup>vii</sup> —Cd1—O1 <sup>ix</sup> | 87.4(7)                       | O6 <sup>vi</sup> —Cd1—O2 <sup>x</sup>    | 116.9(10)       |
| P1—O3 <sup>v</sup>     | 1.47(2)            | O2 <sup>x</sup> —Cd1—O1 <sup>vii</sup>  | 129.9(9)                      | O6 <sup>vi</sup> —Cd1—O2 <sup>xi</sup>   | 116.9(10)       |
| P1—O4                  | 1.60(2)            | O2 <sup>x</sup> —Cd1—O1 <sup>ix</sup>   | 106.8(10)                     | O6 <sup>vi</sup> —Cd1—O4 <sup>vi</sup>   | 44.0(8)         |
| P1—O5                  | 1.42(2)            | O2 <sup>xi</sup> —Cd1—O1 <sup>vii</sup> | 106.8(10)                     | O6 <sup>vi</sup> —Cd1—O5 <sup>x</sup>    | 151.1(9)        |
| P1—O6                  | 1.55(2)            | O2 <sup>xi</sup> —Cd1—O1 <sup>ix</sup>  | 129.9(9)                      |                                          |                 |
| O1—Cd1 <sup>xiv</sup>  | 2.199(13)          | O2 <sup>xi</sup> —Cd1—O2 <sup>x</sup>   | 29.7(18)                      |                                          |                 |

Symmetry codes: (i)  $-x, 0.5+y, -z$ ; (ii)  $-x, -y, -z$ ; (iii)  $-x, 1-y, -z$ ; (iv)  $-x, -0.5+y, -z$ ; (v)  $x, 0.5-y, z$ ; (vi)  $-0.5+x, y, 0.5-z$ ; (vii)  $0.5-x, 1-y, 0.5+z$ ; (viii)  $0.5-x, -y, 0.5+z$ ; (ix)  $0.5-x, -0.5+y, 0.5+z$ ; (x)  $x, y, 1+z$ ; (xi)  $x, 0.5-y, 1+z$ ; (xii)  $-x, 1-y, 1-z$ ; (xiii)  $-x, -y, 1-z$ ; (xiv)  $0.5-x, 1-y, -0.5+z$ ; (xv)  $0.5-x, -y, -0.5+z$ ; (xvi)  $x, y, -1+z$ ; (xvii)  $0.5+x, y, 0.5-z$ .

**Table S6. Anisotropic displacement parameters for 1 in LTP.**

| Atom | $U_{11}$ (Å <sup>2</sup> ) | $U_{22}$ (Å <sup>2</sup> ) | $U_{33}$ (Å <sup>2</sup> ) | $U_{12}$ (Å <sup>2</sup> ) | $U_{13}$ (Å <sup>2</sup> ) | $U_{23}$ (Å <sup>2</sup> ) |
|------|----------------------------|----------------------------|----------------------------|----------------------------|----------------------------|----------------------------|
| Cs1  | 0.0245(3)                  | 0.0232(3)                  | 0.0224(3)                  | -0.0001(2)                 | 0.0004(2)                  | 0.0008(3)                  |
| Cs2  | 0.0268(3)                  | 0.0272(4)                  | 0.0239(3)                  | -0.0015(3)                 | -0.0008(2)                 | -0.0008(3)                 |
| Cd1  | 0.0243(3)                  | 0.0241(4)                  | 0.0220(3)                  | -0.0004(3)                 | 0.0003(2)                  | 0.0000(3)                  |
| Cd2  | 0.0235(3)                  | 0.0239(4)                  | 0.0220(3)                  | 0.0002(3)                  | -0.0002(2)                 | 0.0003(3)                  |
| P1   | 0.0226(11)                 | 0.0227(13)                 | 0.0213(11)                 | 0.0000(11)                 | 0.0006(9)                  | 0.0023(11)                 |
| P2   | 0.0247(11)                 | 0.0213(13)                 | 0.0222(11)                 | 0.0017(11)                 | -0.0006(8)                 | 0.0011(11)                 |
| O1   | 0.024(3)                   | 0.033(4)                   | 0.025(3)                   | -0.003(3)                  | -0.005(2)                  | -0.002(3)                  |
| O2   | 0.023(3)                   | 0.038(4)                   | 0.034(4)                   | -0.001(3)                  | 0.003(3)                   | 0.010(3)                   |
| O3   | 0.025(4)                   | 0.029(4)                   | 0.037(4)                   | 0.001(3)                   | 0.001(3)                   | 0.000(3)                   |
| O4   | 0.022(3)                   | 0.028(4)                   | 0.027(4)                   | 0.002(3)                   | -0.003(3)                  | 0.001(3)                   |
| O5   | 0.031(4)                   | 0.034(4)                   | 0.023(4)                   | 0.004(3)                   | 0.002(3)                   | 0.001(3)                   |
| O6   | 0.034(4)                   | 0.024(4)                   | 0.030(4)                   | 0.000(3)                   | -0.003(3)                  | -0.001(3)                  |
| O7   | 0.024(4)                   | 0.027(4)                   | 0.024(4)                   | -0.005(3)                  | -0.005(3)                  | -0.002(3)                  |
| O8   | 0.029(3)                   | 0.036(4)                   | 0.027(4)                   | -0.002(3)                  | 0.006(3)                   | -0.001(3)                  |

**Table S7. Anisotropic displacement parameters for 1 in HTP.**

| Atom | $U_{11}$ (Å <sup>2</sup> ) | $U_{22}$ (Å <sup>2</sup> ) | $U_{33}$ (Å <sup>2</sup> ) | $U_{12}$ (Å <sup>2</sup> ) | $U_{13}$ (Å <sup>2</sup> ) | $U_{23}$ (Å <sup>2</sup> ) |
|------|----------------------------|----------------------------|----------------------------|----------------------------|----------------------------|----------------------------|
| Cs1  | 0.0595(6)                  | 0.0692(6)                  | 0.0683(6)                  | 0.00000                    | 0.0019(4)                  | 0.00000                    |
| Cd1  | 0.0466(6)                  | 0.0593(6)                  | 0.0641(7)                  | 0.00000                    | -0.0028(4)                 | 0.00000                    |
| P1   | 0.0416(14)                 | 0.0437(15)                 | 0.0521(17)                 | 0.00000                    | -0.0060(12)                | 0.00000                    |
| O1   | 0.09(1)                    | 0.041(6)                   | 0.073(10)                  | 0.026(6)                   | -0.015(7)                  | -0.020(6)                  |
| O2   | 0.073(8)                   | 0.156(16)                  | 0.086(11)                  | -0.013(8)                  | -0.008(9)                  | -0.003(9)                  |
| O3   | 0.113(12)                  | 0.052(10)                  | 0.066(11)                  | -0.001(9)                  | -0.009(9)                  | -0.021(8)                  |
| O4   | 0.064(6)                   | 0.164(13)                  | 0.092(9)                   | 0.00000                    | 0.005(7)                   | 0.00000                    |
| O5   | 0.073(7)                   | 0.159(13)                  | 0.083(9)                   | 0.00000                    | -0.003(7)                  | 0.00000                    |
| O6   | 0.064(8)                   | 0.183(15)                  | 0.094(10)                  | 0.00000                    | -0.011(8)                  | 0.00000                    |
